# Supplementary material for: Analysis of Historical Sources of Heavy Metals in Lake Taihu Based on the Positive Matrix Factorization Model
Source: PubMed Central journal article supplement (PMC6068659; doi:10.3390/ijerph15071540), 2018-07-20
Supplement: ijerph-15-01540-s001.pdf [file ijerph-15-01540-s001.pdf]

Table S1. Operating parameters of ICP-MS (ELAN 9000, Perkin-Elmer SCIEX)

for the determination of element concentrations.

Table S2. Operating parameters of ICP-OES (Optima 5300DV, Perkin-Elmer SCIEX) for the determination of elemental concentrations

Table S3. Uncertainty analysis of the model

Table S4. Detection limit, Quantification limit and Recovery rate for the heavy metals

Table S5. Factor Profiles (% of factor total)

**Table S1.** Operating parameters of ICP-MS (ELAN 9000, Perkin-Elmer SCIEX) for the determination of element concentrations.

| Parameter                                 | Value                                       | Parameter         | Value        |
|-------------------------------------------|---------------------------------------------|-------------------|--------------|
| Nebulizer gas flow (L min <sup>-1</sup> ) | 0.94                                        | RF power (W)      | 1100         |
| Analog stage voltage (V)                  | -1700                                       | Lens voltage (V)  | 6            |
| Pulse stage voltage (V)                   | 900                                         | Ac rod offset (V) | -6           |
| Discriminator threshold (V)               | 70                                          | Scan mode         | Peak hopping |
| Speed of peristaltic pump (rpm)           | 26                                          | Detector          | Pulse        |
| Sweeps/Reading                            | 50                                          | Replicates        | 2            |
| Sampler/Skimmer cones                     | Nickel                                      | Dwell Time (ms)   | 2.5          |
| Spray chamber                             | Ryton® Double-pass Scott-type spray chamber |                   |              |
| Nebulizer                                 | Gem-tip Cross-Flow pneumatic nebulizer      |                   |              |

**Table S2.** Operating parameters of ICP-OES (Optima 5300DV, Perkin-Elmer SCIEX) for the determination of elemental concentrations.

| Parameter                | Value                                 |
|--------------------------|---------------------------------------|
| <b>Plasma argon flow</b> | <b>15 L/min</b>                       |
| Auxiliary argon flow     | 0.2 L/min                             |
| Nebulizer argon flowm    | 0.8 L/min                             |
| Sample flow rate         | 1.50 mL/min                           |
| Spray chamber            | Cyclonic spray chamber                |
| Nebulizer                | Concentric glass (Meinhard) nebulizer |
| Viewing position         | (15, 0)                               |

**Table S3.** Uncertainty analysis of the model.

| Caption                        |          |                 | CV   | Mean  | Maximum | Minimum | SD   |
|--------------------------------|----------|-----------------|------|-------|---------|---------|------|
| Before Chinese economic reform | Industry | Geogenic origin | 0.08 | 20.96 | 22.9    | 17.9    | 1.73 |
|                                |          | Agriculture     | 0.06 | 34.59 | 37.79   | 32.69   | 2.08 |
|                                |          | Geogenic origin | 0.02 | 44.45 | 45.98   | 42.29   | 1.05 |
| After Chinese economic reform  | Industry | Geogenic origin | 0.05 | 55.14 | 61.03   | 52.16   | 2.94 |
|                                |          | Agriculture     | 0.12 | 33.14 | 37.11   | 26.16   | 4.01 |
|                                |          | Geogenic origin | 0.21 | 11.71 | 17.51   | 10.14   | 2.50 |

CV representation of coefficient of variation, SD is a standard deviation.

**Table S4.** Detection limit, Quantification limit and Recovery rate for the heavy metals.

|                                               | <b>As</b> | <b>Cr</b> | <b>Cu</b> | <b>Fe</b> | <b>K</b> | <b>Mg</b> | <b>Mn</b> | <b>Ni</b> | <b>Sr</b> | <b>Ti</b> | <b>Zn</b> | <b>Cd</b> | <b>Pb</b> | <b>Al</b> |
|-----------------------------------------------|-----------|-----------|-----------|-----------|----------|-----------|-----------|-----------|-----------|-----------|-----------|-----------|-----------|-----------|
| Detection limit ( $\mu\text{g g}^{-1}$ )      | 0.1       | 1.5       | 0.4       | 0.035     | 0.04     | 0.03      | 2.5       | 0.5       | 0.3       | 0.45      | 0.018     | 0.001     | 0.006     | 0.2       |
| Quantification limit ( $\mu\text{g g}^{-1}$ ) | 0.3       | 4.5       | 1.2       | 0.105     | 0.12     | 0.09      | 7.5       | 1.5       | 0.9       | 1.6       | 0.06      | 0.003     | 0.02      | 0.6       |
| Recovery rate (%)                             | 73.7      | 109.7     | 112.3     | 89.3      | 85.3     | 83.7      | 76.7      | 83.3      | 88.0      | 73.7      | 95.3      | 92.3      | 89.3      | 85.7      |

**Table S5.** Factor Profiles (% of factor total).

|    | <b>Four factors</b> |          |          |          | <b>Five factors</b> |          |          |          |          | <b>Six factors</b> |          |          |          |          |          |
|----|---------------------|----------|----------|----------|---------------------|----------|----------|----------|----------|--------------------|----------|----------|----------|----------|----------|
|    | Factor 1            | Factor 2 | Factor 3 | Factor 4 | Factor 1            | Factor 2 | Factor 3 | Factor 4 | Factor 5 | Factor 1           | Factor 2 | Factor 3 | Factor 4 | Factor 5 | Factor 6 |
| As | 0.0                 | 39.9     | 4.4      | 55.6     | 17.4                | 26.5     | 16.5     | 0.0      | 39.5     | 8.3                | 0.0      | 6.0      | 0.0      | 48.8     | 36.9     |
| Cr | 4.2                 | 12.3     | 38.4     | 45.2     | 40.1                | 10.1     | 28.5     | 8.8      | 12.6     | 12.7               | 10.9     | 24.1     | 13.3     | 38.9     | 0.0      |
| Cu | 23.5                | 14.7     | 1.3      | 60.5     | 30.6                | 25.7     | 10.2     | 33.0     | 0.6      | 4.7                | 29.1     | 14.9     | 5.0      | 29.9     | 16.3     |
| Fe | 5.9                 | 30.6     | 16.1     | 47.5     | 25.6                | 13.2     | 16.4     | 7.8      | 37.0     | 18.6               | 15.7     | 5.2      | 13.0     | 33.2     | 14.3     |
| K  | 10.8                | 26.7     | 12.3     | 50.3     | 27.3                | 13.6     | 10.9     | 14.4     | 33.8     | 16.7               | 20.0     | 4.0      | 15.7     | 29.6     | 13.9     |
| Mg | 16.0                | 28.4     | 0.1      | 55.5     | 24.2                | 18.0     | 4.2      | 21.6     | 32.0     | 14.4               | 25.9     | 0.0      | 13.7     | 27.0     | 19.1     |
| Mn | 22.5                | 3.2      | 9.9      | 64.4     | 41.7                | 19.0     | 0.5      | 33.2     | 5.5      | 0.0                | 21.6     | 16.4     | 22.1     | 29.3     | 10.6     |
| Ni | 15.0                | 19.9     | 13.2     | 51.9     | 29.3                | 19.3     | 18.5     | 20.6     | 12.4     | 10.9               | 21.4     | 15.5     | 7.0      | 32.2     | 13.0     |
| Sr | 0.0                 | 0.0      | 41.2     | 58.8     | 51.5                | 0.1      | 0.1      | 0.1      | 48.1     | 9.1                | 0.0      | 6.0      | 44.1     | 40.7     | 0.1      |
| Ti | 3.3                 | 33.3     | 24.8     | 38.6     | 22.7                | 9.4      | 26.6     | 2.4      | 39.0     | 25.0               | 15.0     | 8.2      | 9.9      | 32.0     | 9.9      |
| Zn | 12.0                | 16.8     | 15.2     | 56.1     | 34.5                | 19.0     | 14.5     | 19.2     | 12.9     | 8.4                | 18.6     | 14.8     | 11.0     | 35.8     | 11.3     |
| Cd | 0.0                 | 0.0      | 52.9     | 47.1     | 75.3                | 9.0      | 14.1     | 0.0      | 1.6      | 0.0                | 0.0      | 34.6     | 12.4     | 53.0     | 0.0      |
| Pb | 9.7                 | 16.3     | 24.3     | 49.8     | 34.4                | 16.0     | 22.9     | 14.9     | 11.8     | 9.3                | 14.0     | 21.4     | 10.3     | 36.5     | 8.6      |
| Al | 24.6                | 30.8     | 15.7     | 29.0     | 12.6                | 5.0      | 24.0     | 20.9     | 37.4     | 19.5               | 17.2     | 17.1     | 19.2     | 8.4      | 18.5     |
